# Supplementary material
Source: PubMed Central journal article supplement (PMC5512564)
Supplement: NIHMS866814-supplement-Supplementary_material_1.pdf [file NIHMS866814-supplement-Supplementary_material_1.pdf]

**Supp. Table S1. All Newly- and Previously-Reported Mutations in *EFTUD2***

| ID                                         | Exon / Intron       | Mutation Class       | gDNA [hg19; NC_000017.10]     | Predicted cDNA [NM_004247.3] | mRNA Effect  | Predicted Protein [NP_004238.3] | Segregation                                    | Remarks                                                | Reference                                                    |
|--------------------------------------------|---------------------|----------------------|-------------------------------|------------------------------|--------------|---------------------------------|------------------------------------------------|--------------------------------------------------------|--------------------------------------------------------------|
| 1                                          | exon 1 - exon 28    | whole-gene deletion  | ND                            | ND                           | r.0?         | p.0?                            | Unknown                                        | arr cgh 17q21.31(CTD-2145G14)x1; 46,XY                 | this report                                                  |
| 2                                          | exon 1 - exon 28    | whole-gene deletion  | g.42778736_43233331del        | c.-256599_*149906del         | r.0?         | p.0?                            | Unknown                                        | Coordinates approximate                                | Gandomi et al 2013                                           |
| 3                                          | exon 1 - exon 28    | whole-gene deletion  | g.42792021_43147305del        | c.-170573_*136621del         | r.0?         | p.0?                            | De novo                                        | Coordinates approximate                                | Lines et al 2012                                             |
| 4                                          | exon 1 - intron 3   | multi-exon deletion  | g.42963474_42997474del        | c.-20742_271+479del          | r.0?         | p.0?                            | De novo                                        | Coordinates approximate                                | Gordon et al 2012                                            |
| 5                                          | exon 1 - intron 4   | multi-exon deletion  | g.42962474_42985474del        | c.-8742_350+150del           | r.0?         | p.0?                            | De novo                                        | Coordinates approximate                                | Gordon et al 2012                                            |
| 6                                          | intron 11 - exon 28 | multi-exon deletion  | g.42010525_42949809del        | c.994+5_*918117del           | r.0?         | p.0?                            | Unknown                                        | Identified by microarray (Coordinates approximate)     | this report                                                  |
| 7                                          | intron 19 - exon 28 | multi-exon deletion  | g.42923422_42935059del        | c.1963-534_*5220del          | r.0?         | p.0?                            | Unknown                                        | Identified by reduced NGS read depth                   | Lines et al 2012                                             |
| 8                                          | exon 2              | frameshift           | g.42971878del                 | c.12del                      | r.(?)        | p.(Leu5Tyrfs*41)                | Unknown                                        |                                                        | this report                                                  |
| 9                                          | exon 2              | splice site (exonic) | g.42971785C>T                 | c.105G>A                     | r.7_111del   | p.Thr3_Asp37del                 | De novo                                        | Verified by RT-PCR (as per clinical laboratory report) | this report                                                  |
| 10a (proband), 10b (sibling), 10c (mother) | intron 2            | splice site          | g.42964120T>C                 | c.106-2A>G                   | r.spl?       | p.?                             | Germline (inherited) (10a, 10b); unknown (10c) |                                                        | this report                                                  |
| 11                                         | exon 3              | nonsense             | g.42964026G>C                 | c.198C>G                     | r.(?)        | p.(Tyr66*)                      | Unknown                                        |                                                        | Lehalle et al 2014                                           |
| 12                                         | exon 3              | nonsense             | g.42964016C>A                 | c.208G>T                     | r.(?)        | p.(Glu70*)                      | De novo                                        |                                                        | this report                                                  |
| 13                                         | intron 3 - exon 4   | splice site          | g.42962694_42962713del        | c.272-11_280del              | r.272_350del | p.Glu91Valfs*6                  | Unknown                                        | Verified by RT-PCR (Supp. Fig S2)                      | this report                                                  |
| 14                                         | intron 4            | splice site          | g.42961093C>T                 | c.351-1G>A                   | r.spl?       | p.?                             | De novo                                        |                                                        | Voigt et al 2013                                             |
| 15                                         | intron 4            | splice site          | g.42961093C>G                 | c.351-1G>C                   | r.spl?       | p.?                             | Unknown                                        |                                                        | Lehalle et al 2014                                           |
| 16                                         | intron 4            | splice site          | g.42961093C>A                 | c.351-1G>T                   | r.spl?       | p.?                             | De novo                                        |                                                        | Luquetti et al 2013                                          |
| 17a (proband), 17b (mother)                | intron 5            | splice site          | g.[42960528delT; 42960533G>A] | c.[427-2delA;427-7C>T]       | r.spl?       | p.?                             | Germline (inherited) (17a); unknown (17b)      |                                                        | this report; Guion-Almeida et al 2009 (clinical description) |
| 18a (proband), 18b (mother)                | intron 6            | splice site          | g.42960460C>T                 | c.492+1G>A                   | r.spl?       | p.?                             | Germline (inherited) (18a); de novo (18b)      |                                                        | this report                                                  |

| ID                                         | Exon / Intron | Mutation Class                        | gDNA [hg19; NC_000017.10]                     | Predicted cDNA [NM_004247.3] | mRNA Effect | Predicted Protein [NP_004238.3] | Segregation                                    | Remarks | Reference                                                        |
|--------------------------------------------|---------------|---------------------------------------|-----------------------------------------------|------------------------------|-------------|---------------------------------|------------------------------------------------|---------|------------------------------------------------------------------|
| 19                                         | exon 7        | nonsense                              | g.42959085G>T                                 | c.498C>A                     | r.(?)       | p.(Cys166*)                     | Unknown                                        |         | Lehalle et al 2014                                               |
| 20                                         | intron 7      | splice site                           | g.42958013C>T                                 | c.529-1G>A                   | r.spl?      | p.?                             | Unknown                                        |         | Lehalle et al 2014                                               |
| 21                                         | exon 8        | nonsense                              | g.42957947A>C                                 | c.594T>G                     | r.(?)       | p.(Tyr198*)                     | De novo                                        |         | Voigt et al 2013                                                 |
| 22                                         | exon 8        | frameshift                            | g.42957939dup                                 | c.602dupA                    | r.(?)       | p.(Asn201Lysfs*13)              | De novo                                        |         | Vincent et al. 2015                                              |
| 23                                         | intron 8      | splice site                           | g.42957921C>T                                 | c.619+1G>A                   | r.spl?      | p.?                             | De novo                                        |         | Gordon et al 2012                                                |
| 24                                         | exon 9        | missense substitution                 | g.42957003T>C                                 | c.623A>G                     | r.(?)       | p.(His208Arg)                   | De novo                                        |         | Gordon et al 2012                                                |
| 25                                         | exon 9        | missense substitution                 | g.42956956C>T                                 | c.670G>A                     | r.(?)       | p.(Gly224Arg)                   | Unknown                                        |         | Gordon et al 2012                                                |
| 26                                         | exon 9        | frameshift                            | g.42956928del                                 | c.698del                     | r.(?)       | p.(Glu233Glyfs*3)               | De novo                                        |         | Need et al 2012                                                  |
| 27                                         | intron 9      | splice site                           | g.42956923del                                 | c.702+1del                   | r.spl?      | p.?                             | Unknown                                        |         | Lehalle et al 2014                                               |
| 28                                         | intron 9      | splice site                           | g.42956919C>G                                 | c.702+5G>C                   | r.(spl?)    | p.?                             | De novo                                        |         | Lehalle et al 2014                                               |
| 29, 30                                     | intron 9      | splice site                           | g.42956919C>T                                 | c.702+5G>A                   | r.(spl?)    | p.?                             | De novo (30); unknown (29)                     |         | this report                                                      |
| 31                                         | exon 10       | nonsense                              | g.42953426C>A                                 | c.745G>T                     | r.(?)       | p.(Glu249*)                     | De novo                                        |         | Lehalle et al 2014                                               |
| 32, 33, 34                                 | exon 10       | missense substitution                 | g.42953387G>A                                 | c.784C>T                     | r.(?)       | p.(Arg262Trp)                   | De novo (32, 33); unknown (34)                 |         | Lines et al 2012 (32); Smigiel et al 2015 (33); this report (34) |
| 35                                         | exon 10       | small deletion/duplication (stopgain) | g.[42953384_42953387del;42953369_42953380dup] | c.[784_787del;791_802dup]    | r.(?)       | p.(Arg262*)                     | Unknown                                        |         | Lines et al 2012                                                 |
| 36                                         | exon 11       | frameshift                            | g.42949875dup                                 | c.933dupC                    | r.(?)       | p.(Ser312Leufs*22)              | De novo                                        |         | Sarkar et al 2015                                                |
| 37a (proband), 37b (sibling), 37c (parent) | intron 11     | splice site                           | g.42949813C>G                                 | c.994+1G>C                   | r.spl?      | p.?                             | Germline (inherited) (37a, 37b); unknown (37c) |         | Voigt et al 2013                                                 |
| 38                                         | intron 11     | splice site                           | g.42949809C>T                                 | c.994+5G>A                   | r.(spl?)    | p.?                             | De novo                                        |         | Need et al 2012                                                  |
| 39                                         | exon 12       | splice site                           | g.42945661del                                 | c.1052del                    | r.(?)       | p.(Pro351Leufs*35)              | De novo                                        |         | this report                                                      |
| 40                                         | intron 13     | splice site                           | g.42945170C>A                                 | c.1149+5G>T                  | r.(spl?)    | p.?                             | De novo                                        |         | Lehalle et al 2014                                               |
| 41                                         | exon 14       | frameshift                            | g.42942404_42942411del                        | c.1172_1179del               | r.(?)       | p.(Ser391Thrfs*57)              | De novo                                        |         | Lines et al 2012                                                 |
| 42, 43                                     | exon 15       | frameshift                            | g.42941138_42941139del                        | c.1297_1298del               | r.(?)       | p.(Met433Valfs*17)              | De novo (42), unknown (43)                     |         | this report                                                      |

| ID                                   | Exon / Intron       | Mutation Class        | gDNA [hg19; NC_000017.10]                  | Predicted cDNA [NM_004247.3]        | mRNA Effect    | Predicted Protein [NP_004238.3] | Segregation                                                 | Remarks                                                                                                            | Reference                                          |
|--------------------------------------|---------------------|-----------------------|--------------------------------------------|-------------------------------------|----------------|---------------------------------|-------------------------------------------------------------|--------------------------------------------------------------------------------------------------------------------|----------------------------------------------------|
| 44                                   | exon 15             | missense substitution | g.42941130G>C                              | c.1306C>G                           | r.(?)          | p.(Gln436Glu)                   | De novo                                                     | Originally reported as "c.1458C>G / p.Gln401Glu"                                                                   | Luquetti et al 2013                                |
| 45                                   | exon 16             | missense substitution | g.42940262A>G                              | c.1426T>C                           | r.(?)          | p.(Cys476Arg)                   | Unknown                                                     |                                                                                                                    | Lines et al 2012                                   |
| 46                                   | exon 16             | frameshift            | g.42940253dup                              | c.1435dup                           | r.(?)          | p.(Thr479Asnfs*2)               | De novo                                                     |                                                                                                                    | Lehalle et al 2014, Smigiel et al 2015             |
| 47a (proband), 47b (mother)          | exon 16             | missense substitution | g.42940192C>T                              | c.1496G>A                           | r.(?)          | p.(Gly499Asp)                   | Germline (inherited) (47a); de novo (47b)                   |                                                                                                                    | this report                                        |
| 48                                   | intron 16           | splice site           | g.42940078T>C                              | c.1607+3A>G                         | r.(spl?)       | p.?                             | Unknown                                                     |                                                                                                                    | Lines et al 2012                                   |
| 49, 50                               | exon 17             | nonsense              | g.42937814G>A                              | c.1705C>T                           | r.(?)          | p.(Arg569*)                     | De novo (49); unknown (50)                                  |                                                                                                                    | Gordon et al 2012 (49); this report (50)           |
| 51, 52, 53a, (proband), 53b (mother) | exon 18             | nonsense              | g.42937401G>A                              | c.1732C>T                           | r.(?)          | p.(Arg578*)                     | De novo (51, 52); germline (inherited) (53a); unknown (53b) |                                                                                                                    | Sarkar et al 2015 (51); this report (52, 53a, 53b) |
| 54                                   | exon 18             | frameshift            | g.42937373_42937374del                     | c.1759_1760del                      | r.(?)          | p.(Val587Tyrfs*18)              | Unknown                                                     |                                                                                                                    | Lines et al 2012                                   |
| 55                                   | exon 18             | missense substitution | g.42937273C>G                              | c.1860G>C                           | r.(?)          | p.(Lys620Asn)                   | De novo                                                     |                                                                                                                    | Lehalle et al 2014                                 |
| 56                                   | exon 18 / intron 18 | splice site           | g.[42937274T>A;42937269_42937270delinsCTC] | c.[1859A>T; 1860+3_1860+4delinsGAG] | r.1720_1860del | p.Ala574_Lys620del              | De novo                                                     | Originally reported as "p.(Lys620Met)"; additional splice mutation subsequently confirmed by RT-PCR (Supp. Fig S2) | Smigiel et al 2015                                 |
| 57                                   | intron 18           | splice site           | g.42936551T>C                              | c.1861-2A>G                         | r.spl?         | p.?                             | Unknown                                                     |                                                                                                                    | this report                                        |
| 58                                   | exon 19             | missense substitution | g.42936500A>C                              | c.1910T>G                           | r.(?)          | p.(Leu637Arg)                   | De novo                                                     |                                                                                                                    | Lines et al 2012                                   |
| 59                                   | intron 19           | splice site           | g.42936447C>T                              | c.1962+1G>A                         | r.spl          | p.?                             | Unknown                                                     |                                                                                                                    | Lehalle et al 2014                                 |
| 60                                   | intron 19           | splice site           | g.42934527T>A                              | c.1963-2A>T                         | r.1963_2045del | p.Val655Glufs*8                 | Unknown                                                     | Verified by RT-PCR (Supp. Fig S2)                                                                                  | this report                                        |
| 61                                   | exon 20             | frameshift            | g.42934512delinsGGTGG                      | c.1976delinsCCACC                   | r.(?)          | p.(Val659Alafs*7)               | De novo                                                     |                                                                                                                    | Lehalle et al 2014                                 |
| 62                                   | exon 20             | missense substitution | g.42934455G>T                              | c.2033C>A                           | r.(?)          | p.(Thr678Lys)                   | De novo                                                     |                                                                                                                    | this report                                        |
| 63                                   | intron 20           | splice site           | g.42934442C>T                              | c.2045+1G>A                         | r.spl?         | p.?                             | De novo                                                     |                                                                                                                    | this report                                        |
| 64                                   | intron 20           | splice site           | g.42934441A>C                              | c.2045+2T>G                         | r.spl?         | p.?                             | Unknown                                                     |                                                                                                                    | this report                                        |
| 65                                   | exon 22             | nonsense              | g.42932028G>A                              | c.2155C>T                           | r.(?)          | p.(Gln719*)                     | De novo                                                     |                                                                                                                    | Lines et al 2012                                   |

| ID                               | Exon / Intron | Mutation Class                           | gDNA [hg19; NC_000017.10] | Predicted cDNA [NM_004247.3] | mRNA Effect                                        | Predicted Protein [NP_004238.3]                         | Segregation                                                                                | Remarks                                              | Reference                                       |
|----------------------------------|---------------|------------------------------------------|---------------------------|------------------------------|----------------------------------------------------|---------------------------------------------------------|--------------------------------------------------------------------------------------------|------------------------------------------------------|-------------------------------------------------|
| 66                               | exon 22       | nonsense                                 | g.42931985C>T             | c.2198G>A                    | r.(?)                                              | p.(Trp733*)                                             | Unknown                                                                                    |                                                      | Gordon et al 2012                               |
| 67                               | exon 22       | frameshift                               | g.42931938dup             | c.2245dup                    | r.(?)                                              | p.(Thr749Asnfs*5)                                       | Unknown                                                                                    |                                                      | Lehalle et al 2014                              |
| 68                               | exon 22       | frameshift                               | g.42931930delG            | c.2253delC                   | r.(?)                                              | p.(Ser752Leufs*11)                                      | Unknown                                                                                    |                                                      | Vincent et al. 2015                             |
| 69                               | intron 22     | splice site                              | g.42931923C>T             | c.2259+1G>A                  | r.spl?                                             | p.?                                                     | De novo                                                                                    |                                                      | Gordon et al 2012                               |
| 70                               | exon 23       | frameshift                               | g.42931688del             | c.2296del                    | r.(?)                                              | p.(Ile766Serfs*18)                                      | Unknown                                                                                    |                                                      | Lehalle et al 2014                              |
| 71                               | exon 23       | missense substitution                    | g.42931679C>G             | c.2305G>C                    | r.(?)                                              | p.(Gly769Arg)                                           | Unknown                                                                                    |                                                      | this report                                     |
| 72                               | exon 23       | frameshift                               | g.42931649dup             | c.2335dup                    | r.(?)                                              | p.(Leu779Profs*3)                                       | De novo                                                                                    |                                                      | this report                                     |
| 73                               | intron 23     | intronic (putatively novel splice donor) | g.42931571T>C             | c.2347+66A>G                 | r.(spl?)                                           | p.?                                                     | Germline (inherited)                                                                       | Inherited from healthy father; pathogenicity unclear | Gordon et al 2012                               |
| 74                               | intron 24     | splice site                              | g.42930759C>A             | c.2467-1G>T                  | r.spl?                                             | p.?                                                     | Unknown                                                                                    |                                                      | Lehalle et al 2014                              |
| 75                               | exon 25       | missense substitution                    | g.42930758C>T             | c.2467G>A                    | r.(?)                                              | p.(Ala823Thr)                                           | De novo                                                                                    |                                                      | Vincent et al. 2015                             |
| 76                               | exon 25       | missense substitution                    | g.42930740C>T             | c.2485G>A                    | r.(?)                                              | p.(Glu829Lys)                                           | De novo                                                                                    |                                                      | Luquetti et al 2013                             |
| 77                               | exon 25       | nonsense                                 | g.42930732G>T             | c.2493C>A                    | r.(?)                                              | p.(Tyr831*)                                             | De novo                                                                                    |                                                      | Lines et al 2012                                |
| 78, 79a (proband), 79b (sibling) | exon 25       | nonsense                                 | g.42930729G>C             | c.2496C>G                    | r.(?)                                              | p.(Tyr832*)                                             | Unknown (78); Maternal germline mosaicism (proven by SNP testing) (79a, 79b; Supp. Fig S1) | Originally reported as "c.2495C>G"                   | Bernier et al 2012 (78); this report (79a, 79b) |
| 80, 81, 82                       | intron 25     | splice site                              | g.42929932del             | c.2562-2del                  | r.spl?                                             | p.?                                                     | De novo (80, 81); unknown (82)                                                             |                                                      | Lehalle et al 2014                              |
| 83, 84a (proband), 84b (mother)  | intron 25     | splice site                              | g.42929931_42929932del    | c.2562-2_2562-1del           | r.spl?                                             | p.?                                                     | Unknown (83, 84b); germline (inherited) (84a)                                              |                                                      | Lehalle et al 2014                              |
| 85                               | intron 25     | splice site                              | g.42929931C>T             | c.2562-1G>A                  | r.spl?                                             | p.?                                                     | Unknown                                                                                    |                                                      | Lehalle et al 2014                              |
| 86                               | intron 25     | splice site                              | g.42929931C>G             | c.2562-1G>C                  | r.[=, 2467_2577 del, 2562_2577 del, 2562_2715 del] | p.[=, Ala823_Gln895del, Gly855Metfs*75, Gly855Leufs*29] | De novo                                                                                    |                                                      | Voigt et al 2013                                |

| ID                              | Exon / Intron | Mutation Class        | gDNA [hg19; NC_000017.10]         | Predicted cDNA [NM_004247.3] | mRNA Effect | Predicted Protein [NP_004238.3] | Segregation                               | Remarks                                                             | Reference                             |
|---------------------------------|---------------|-----------------------|-----------------------------------|------------------------------|-------------|---------------------------------|-------------------------------------------|---------------------------------------------------------------------|---------------------------------------|
| 87                              | exon 26       | missense substitution | g.42929926G>A                     | c.2566C>T                    | r.(?)       | p.(His856Tyr)                   | Unknown                                   |                                                                     | Lehalle et al 2014                    |
| 88                              | exon 26       | frameshift            | g.42929871_42929873del<br>insGACC | c.2619_2621delinsGGTC        | r.(?)       | p.(Phe874Valfs*11)              | De novo                                   |                                                                     | Gordon et al 2012                     |
| 89a (proband),<br>89b (sibling) | exon 26       | frameshift            | g.42929870dup                     | c.2622dup                    | r.(?)       | p.(Ile875Tyrfs*10)              | Germline mosaicism (89a, 89b)             | Two affected siblings; parental testing normal; paternity confirmed | Voigt et al 2013                      |
| 90a (proband),<br>90b (mother)  | exon 26       | frameshift            | g.42929791_42929794del            | c.2698_2701del               | r.(?)       | p.(Val900Serfs*34)              | Germline (inherited) (90a); unknown (90b) |                                                                     | this report                           |
| 91                              | exon 26       | nonsense              | g.42929131G>A                     | c.2770C>T                    | r.(?)       | p.(Gln924*)                     | Unknown                                   |                                                                     | Lines et al 2012; Vincent et al. 2015 |
| 92                              | exon 27       | missense substitution | g.42929088C>T                     | c.2813G>A                    | r.(?)       | p.(Arg938His)                   | De novo                                   |                                                                     | this report                           |
| 93a (fetus),<br>93b (mother)    | intron 27     | splice site           | g.42929077del                     | c.2823+1del                  | r.spl?      | p.?                             | Germline (inherited) (93a); de novo (93b) |                                                                     | Gordon et al 2012, Lehalle et al 2014 |
| 94                              | intron 27     | splice site           | g.42929077C>A                     | c.2823+1G>T                  | r.spl?      | p.?                             | Unknown                                   |                                                                     | this report                           |

For gDNA numbering:

Nucleotide numbering is from the first base of the chromosome 17 reference sequence [hg19] (NC\_000017.10).

For cDNA numbering:

Nucleotide numbering uses +1 as the A of the ATG translation initiation codon in the reference sequence, with the initiation codon as codon 1.

Data confirming maternal gonadal mosaicism for c.2496C>G in probands 79a and 79b are presented in Supp. Figure S1.

RT-PCR data confirming splice mutations c.1963-2A>T, c.272-11\_280del, and c.[1859A>T; 1860+3\_1860+4delinsGAG] are presented in Supp. Figure S2.

The c.1058+3\_1058+7del variant reported by Gordon et al (2012) has been omitted. As of September 2015, this variant is represented in the Exome Aggregation Consortium (ExAC) dataset (<http://exac.broadinstitute.org/>) with a frequency of 656/120582 (0.544%), including two homozygous individuals, and is therefore deemed non-pathogenic.

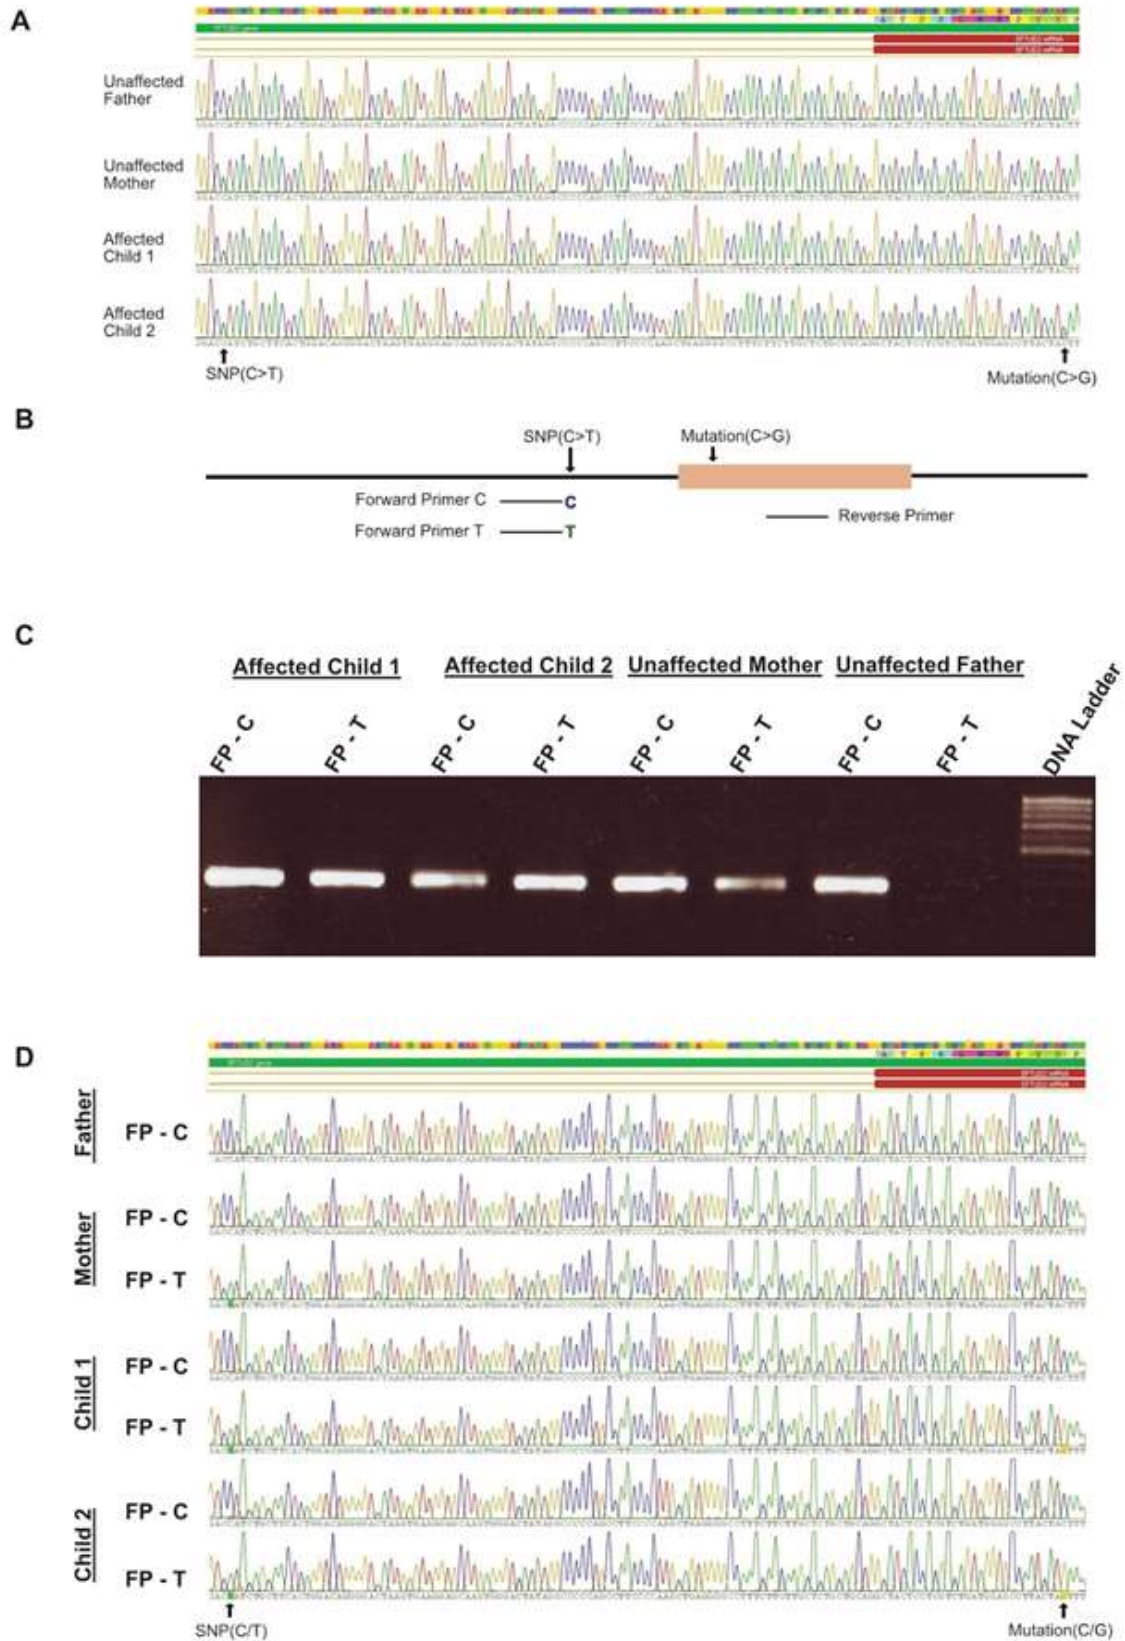

Supp. Figure S1

**Supp. Figure S1. Confirmation of ovarian mosaicism in kindred 79.**

**Panel A:** Genomic sequencing of intron 24 - exon25 boundary. C/T SNP rs78620114 (at left) is coamplified with the mutation, c.2496C>G p.(Tyr832\*). This SNP is heterozygous in both probands and in their unaffected mother, and homozygous (C;C) in their unaffected father. Both probands have therefore inherited their "T" allele from their unaffected mother, and the "C" allele from their unaffected father. Genomic primers for exon 25 are as previously reported in [Lines et al., 2012].

**Panel B:** Schematic of allele-specific PCR with alternate forward primers to selectively amplify either allele of rs78620114. The reverse primer (TGTAGGAGCCGAGGTGACTC) is common to all reactions. The forward primers, either 'FP-C' (AGAGAATGGGGCGGTAGGGGACC) or 'FP-T' (AGAGAATGGGGCGGTAGGGGACT) are selective for either the 'C' or 'T' allele of rs78620114, respectively. Position c.2496, the site of the probands' mutation, is coamplified with rs78620114.

**Panel C:** PCR amplification of leukocyte DNA was performed in the probands and both parents using standard protocols, according to the scheme in Panel B. As expected, FP-T fails to amplify in the probands' unaffected father, whose rs78620114 genotype is C/C.

**Panel D:** Sequencing of PCR products from Panel C. The 'T' allele of rs78620114 is in phase with the c.2496C>G p.(Tyr832\*) mutation in both probands, indicating that the mutation occurs on the maternal allele. Maternal gonadal mosaicism is inferred.

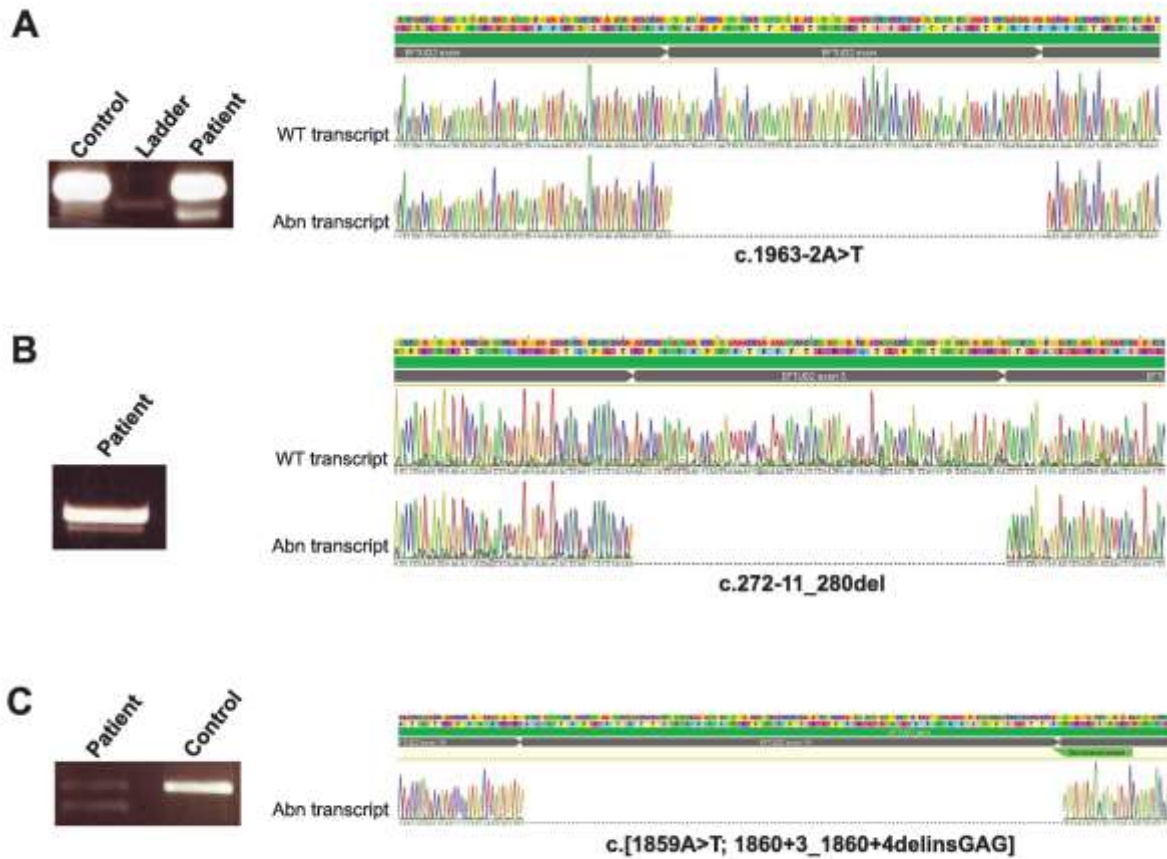

**Supp. Figure S2. Reverse transcriptase PCR (RT-PCR) validation of splice site mutations.**

RT-PCR was performed on either lymphoblast or fibroblast RNA (as indicated below), products separated by agarose gel electrophoresis, and individual bands excised and sequenced, according to standard protocols. Chromatograms are shown aligned to cDNA reference (NM\_004247.3)

**Panel A:** c.1963-2A>T / r.1963\_2045del in individual 60. (Fibroblast RNA; primers: AATGAGGAGGCTCAGATTTTC, GAGCCTTGCCACCTCAGAGG).

**Panel B:** c.272-11\_280del / r.272\_350del in individual 13. (Lymphoblast RNA; Primers: AGGCGAGAGCATCATGGATAC, CAGTATAGCACAGATCTTGGTC).

**Panel C:** c.[1859A>T; 1860+3\_1860+4delinsGAG] / r.1720\_1860del in individual 56. (Lymphoblast RNA; Primers: GACTGTGACCCTGATGGC, CATGGTGATCTTGTTCTTC).
